# Supplementary material
Source: PubMed Central journal article supplement (PMC5034108)
Supplement: cr201676x1.pdf [file cr201676x1.pdf]

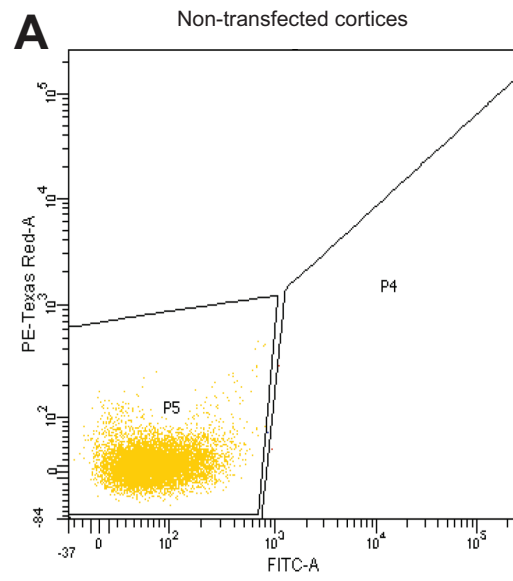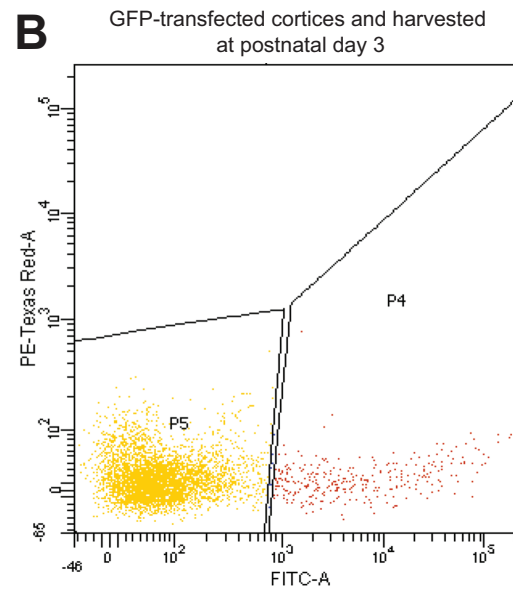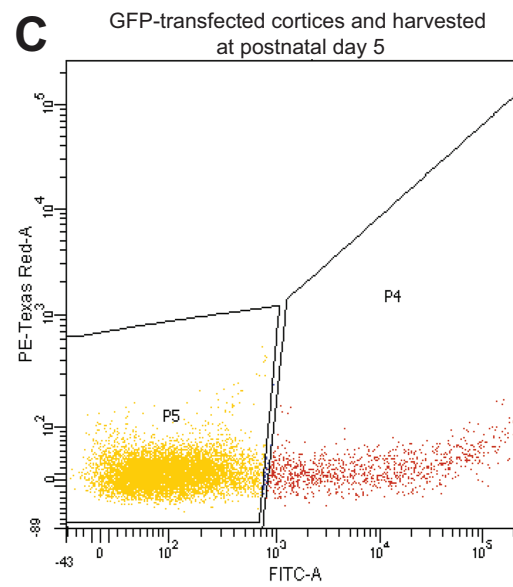

**Figure S1. FACS of GFP positive cells from transfected cortices.** (A) Dissociated cells from non-electroporated cortices were used to set the gates. Representative scatter plot of FACS sorting of GFP positive cells from cortices electroporated at E15 and dissected at postnatal day 3 (B) and postnatal day 5 (C). P5 = fraction of non-transfected cells; P4 = fraction of GFP-transfected cells.
