# Supplementary material
Source: PubMed Central journal article supplement (PMC5034108)
Supplement: cr201676x2.pdf [file cr201676x2.pdf]

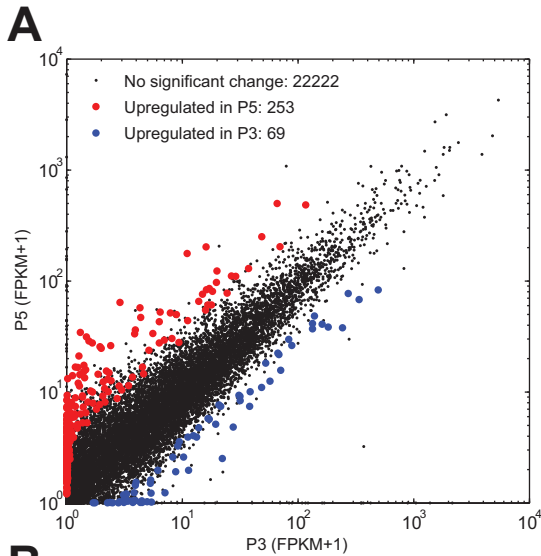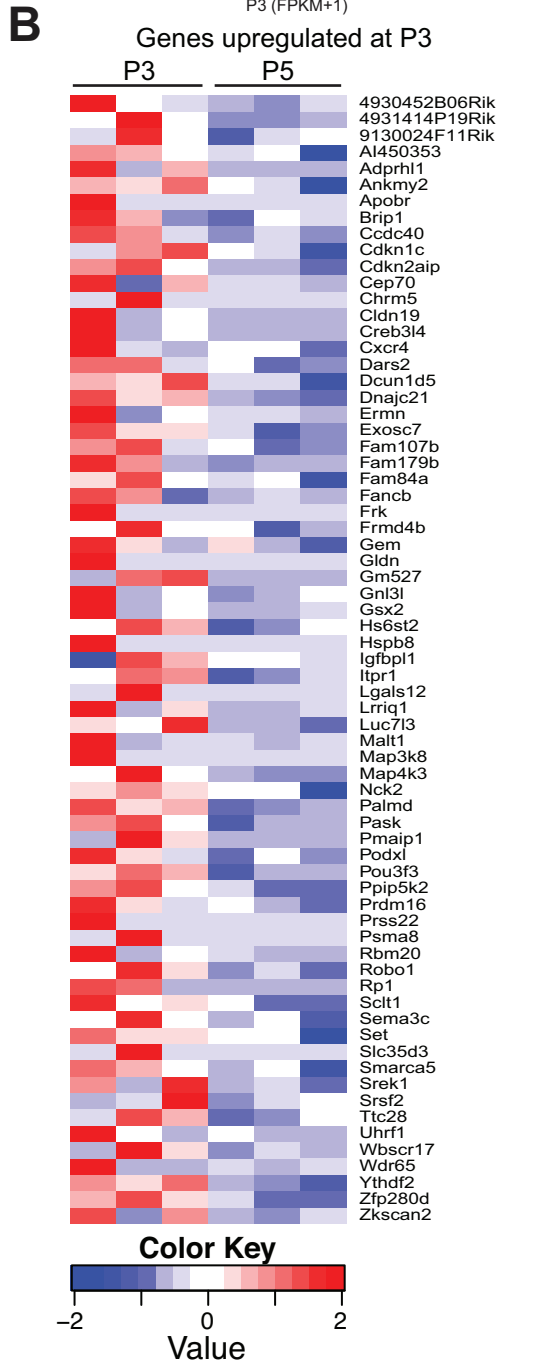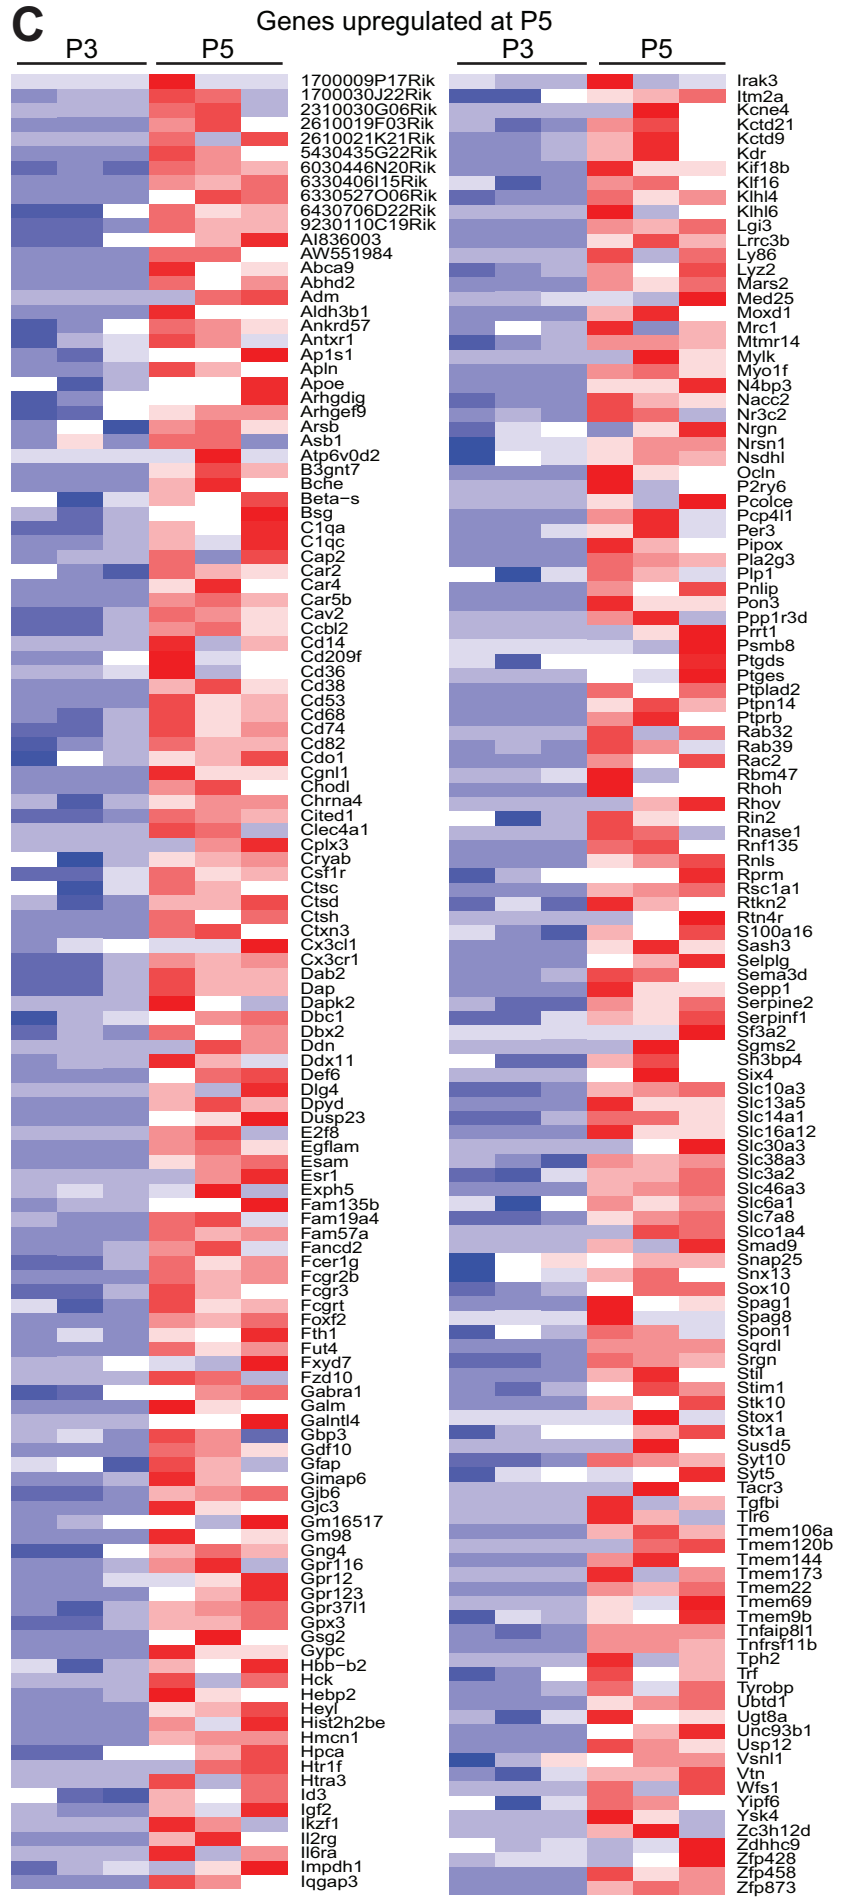

**Figure S2. Heat maps showing the up-regulated genes at P3 and P5.** (A) Scatter plot that shows 69 (blue) and 253 (red) genes up regulated at P3 and P5, respectively (FPKM: fragments per kilobase of transcript per million mapped reads). (B) 69 genes are up regulated at P3 compared to P5. (C) At P5, 253 genes are up regulated compared to P3.
