# Supplementary material
Source: PubMed Central journal article supplement (PMC5034108)
Supplement: cr201676x4.pdf [file cr201676x4.pdf]

Figure S4 (de Anda FC)

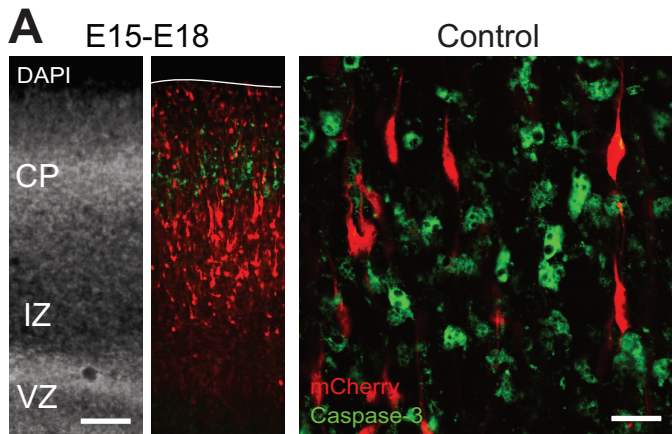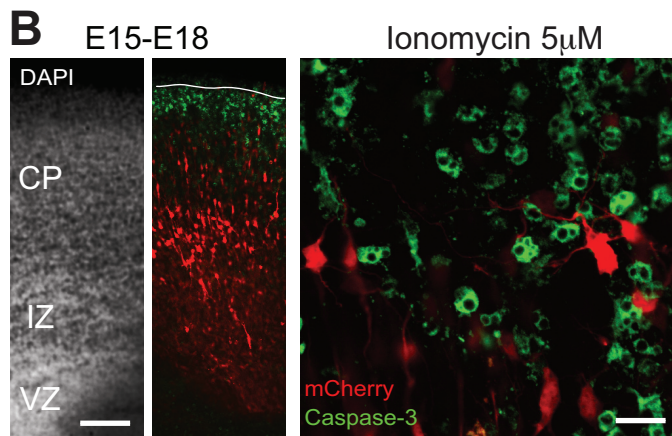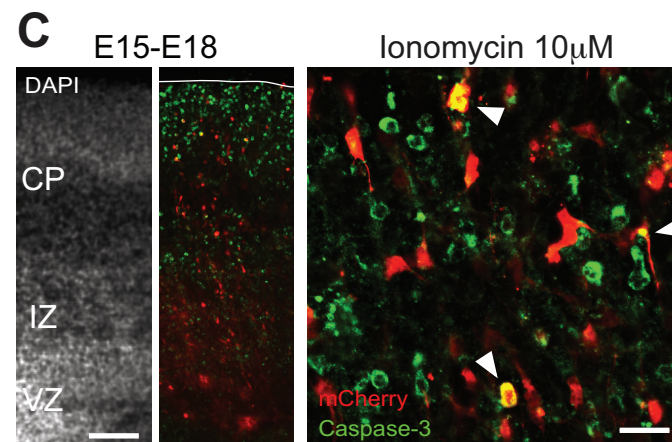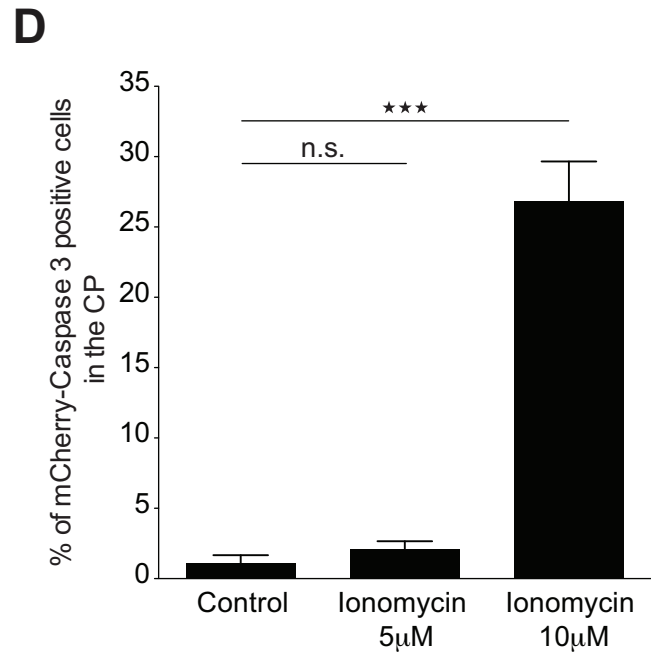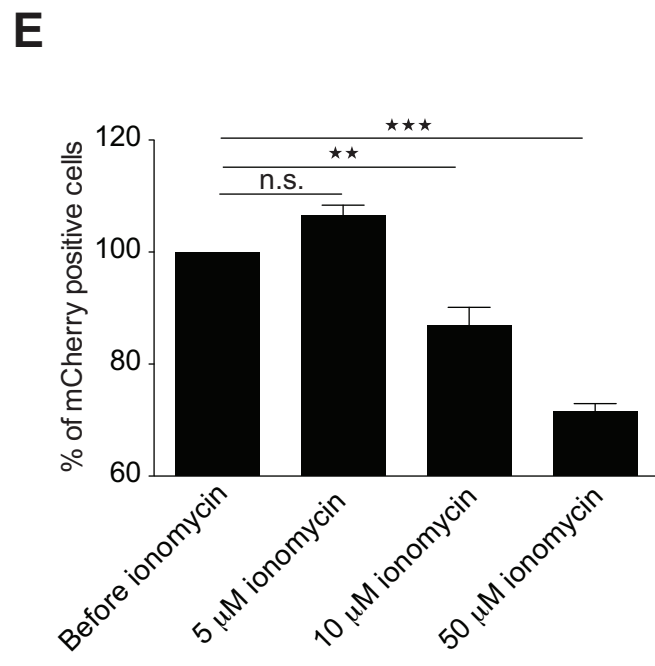

**Figure S4. Ionomycin has a dose-response effect in developing cortical neurons.** (A) In control slices (*in utero* electroporated at E15, brain slices prepared at E18 and incubated 24 hr) low percentage ( $1.09 \pm 0.57\%$ ) of mCherry-transfected cell in the CP express caspase-3. (B) Ionomycin 5  $\mu\text{M}$  does not change the expression of caspase-3 in mCherry-transfected cell in the CP compared with control slices ( $2.12 \pm 0.53\%$ ; *in utero* electroporated at E15, brain slices prepared at E18 and incubated 24 hr). (C) Ionomycin 10  $\mu\text{M}$  increases significantly the expression of caspase-3 in mCherry-transfected cell in the CP compare with control slices ( $26.80 \pm 2.85\%$ ; *in utero* electroporated at E15, brain slices prepared at E18 and incubated 24 hr). (D) Quantification from (A-C) showing percentage of mCherry-transfected cells positive to caspase-3 in the CP upon ionomycin treatment (Control = 1108 cells from fourteen slices from five brains from three litters; 5  $\mu\text{M}$  = 1320 cells from twenty one slices from eight brains from three litters; 10  $\mu\text{M}$  = 637 cells from twelve slices from four brains from three litters  $p < 0.0001$  by one-way ANOVA, posthoc Dunnett test  $***p < 0.001$ ; values are mean  $\pm$  s.e.m.). (E) Dose-response effect of ionomycin in cell number of mCherry transfected cells in the CP. Cortical slices were prepared for time-lapse analysis at E18 (*in utero* electroporated at E15). Time-lapse analysis was performed before (1 hr) and after ionomycin treatment (12 hr of ionomycin treatment). 50 $\mu\text{M}$  ( $71.48 \pm 1.44\%$ ) and 10  $\mu\text{M}$  ( $86.90 \pm 3.23\%$ ) decreased significantly the number of mCherry transfected cells in the cortical plate after 12 hr imaging. 5 $\mu\text{M}$  did not decrease the number of mCherry-transfected cells in the CP (106.55  $\pm$  1.82%; 5 $\mu\text{M}$  (before ionomycin) = 174 cells from four slices; 10 $\mu\text{M}$  (before ionomycin) = 180 cells from four slices; 50 $\mu\text{M}$  (before ionomycin) = 222 cells from four slices;  $p < 0.0001$  by one-way ANOVA, posthoc Dunnett test  $**p < 0.01$ ,  $***p < 0.001$ ; values are mean  $\pm$  s.e.m.). Scale bar: 200  $\mu\text{m}$  (left panel) and 20  $\mu\text{m}$  (right panel).
