# Supplementary material
Source: PubMed Central journal article supplement (PMC5034108)
Supplement: cr201676x5.pdf [file cr201676x5.pdf]

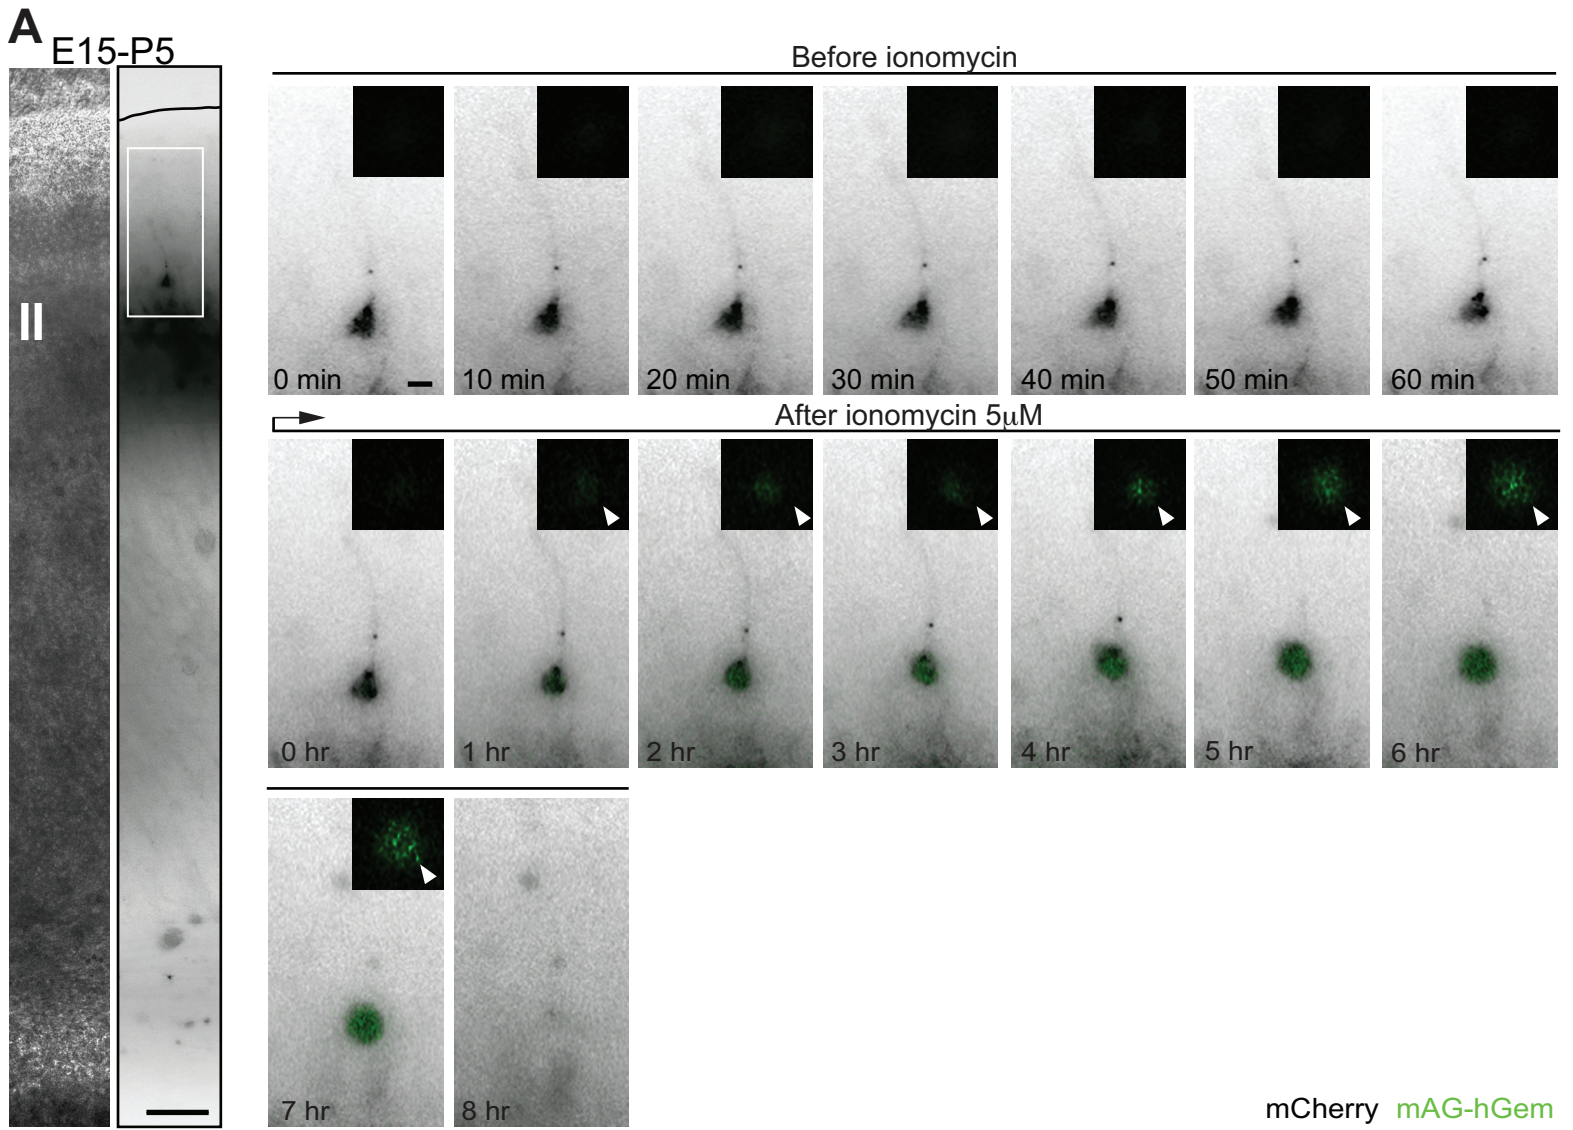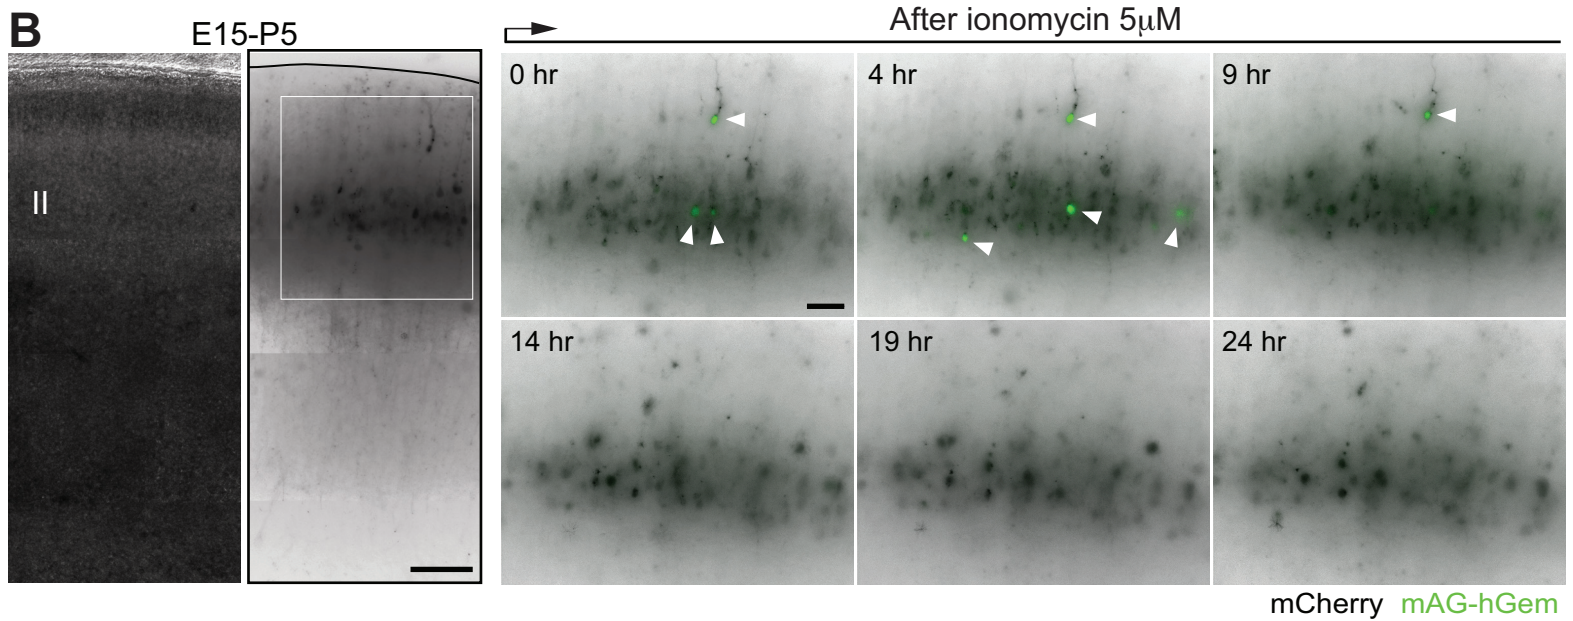

**Figure S5. Calcium influx induces cell death in developing neurons from layer II at P5.** (A, B) At P5 cells at layer II mCherry / mAG-hGem-electroporated neurons initiate nuclear expression of mAG-hGem (white arrowheads) but died shortly thereafter. Left panel: cortical slice used for time-lapse at P5 (*in utero* electroporated at E15). Right panel: Time-lapse sequence of layer II upon ionomycin treatment. Scale bar: (A) 150  $\mu\text{m}$  (left panel) and 100  $\mu\text{m}$  (right panel), (B) 50  $\mu\text{m}$  (left panel) and 10  $\mu\text{m}$  (right panel).
