# Supplementary material
Source: PubMed Central journal article supplement (PMC5034108)
Supplement: cr201676x6.pdf [file cr201676x6.pdf]

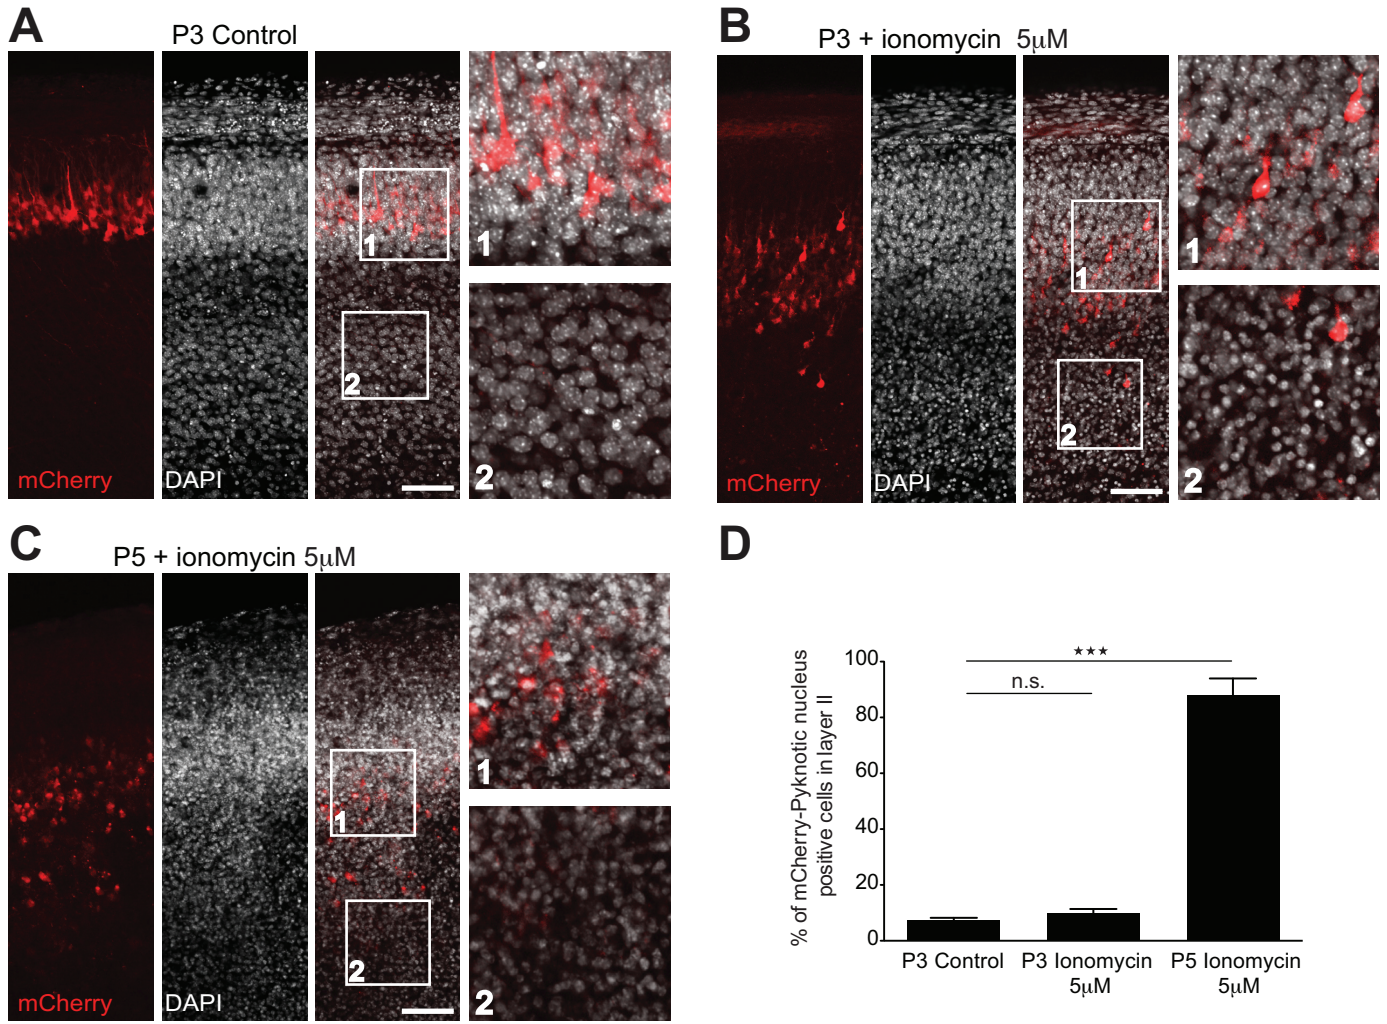

**Figure S6. Ionomycin treatment induces pyknotic nuclei in upper layer neurons at P5.** (A) Control slices *in utero* electroporated at E15 with mCherry plasmid. At P3, slices were treated with vehicle for 24 hr and fix to label nuclei. No nuclei defects were detected in upper (box 1) or deep layers (box 2). (B) Ionomycin treatment at P3 induces the formation of pyknotic nuclei in deep layers but not in upper layers where mCherry transfected neurons are located. (C) At P5, ionomycin treatment produces pyknotic nuclei in deep and upper layers. (D) Quantification from A-C showing percentage of mCherry-transfected cells positive to pyknotic nucleus in layer II upon ionomycin treatment ( $p < 0.0001$  by one-way ANOVA, posthoc Dunnett test  $***p < 0.001$ ; values are mean  $\pm$  s.e.m.). Scale bar: 100  $\mu$ m.
