# Supplementary material
Source: PubMed Central journal article supplement (PMC5034108)
Supplement: cr201676x7.pdf [file cr201676x7.pdf]

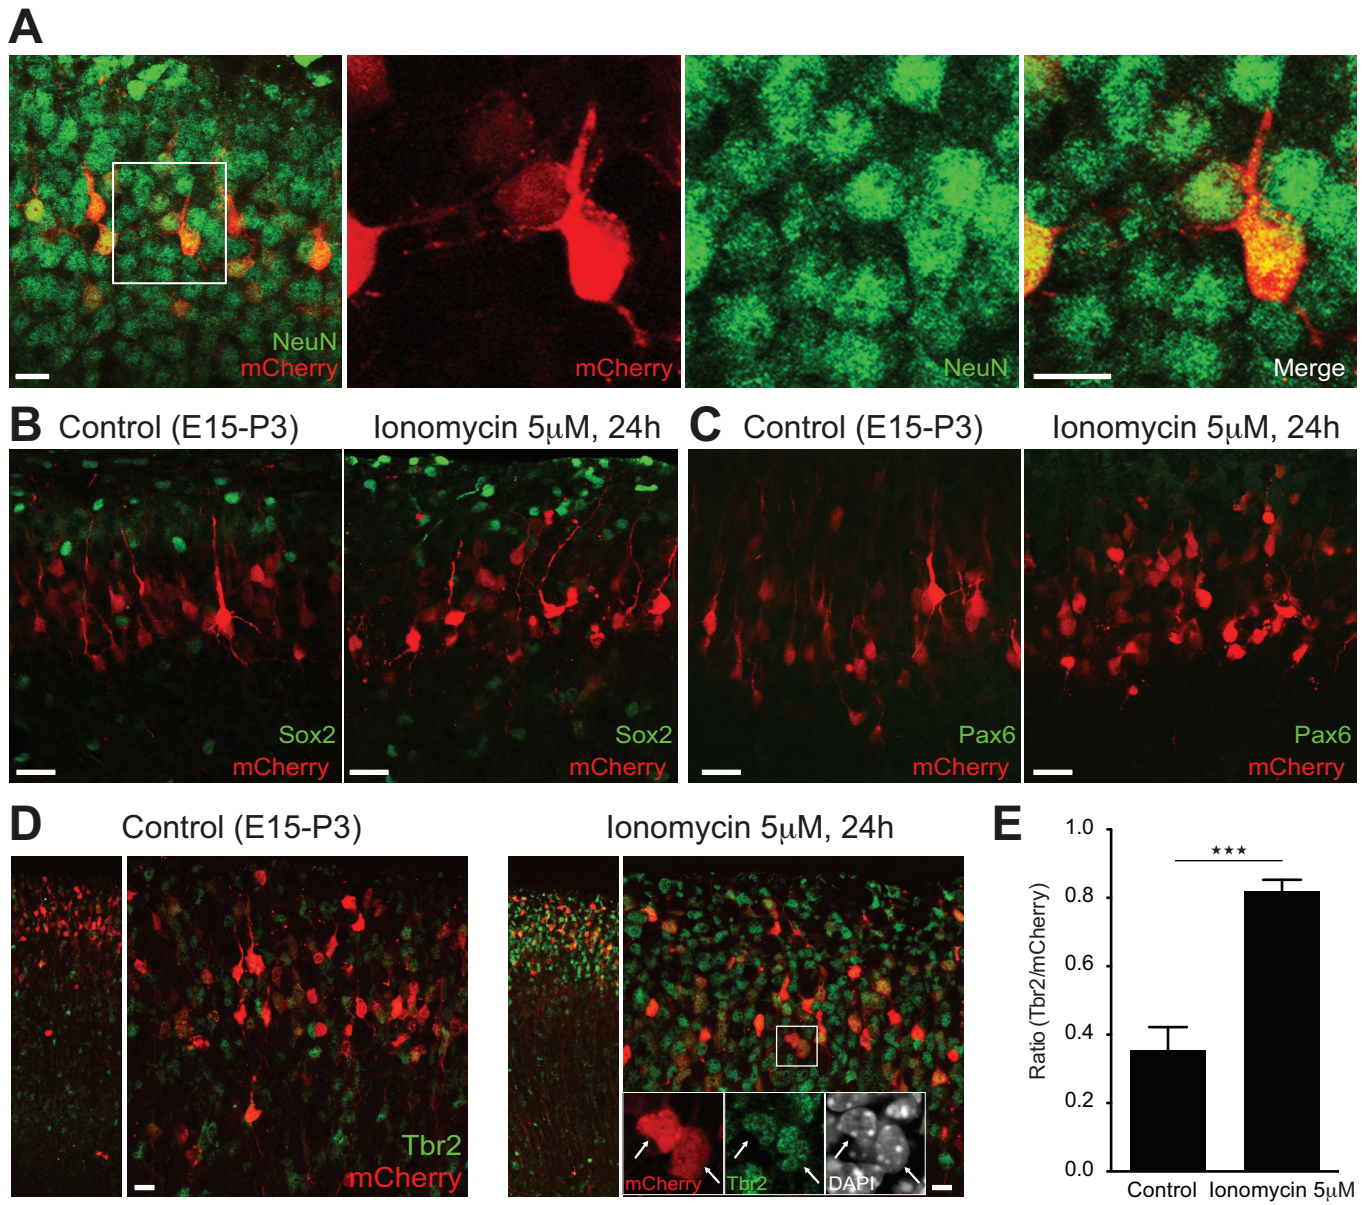

**Figure S7. Newly born neurons express Tbr2 upon calcium influx.** (A) Neurons from cortical layer II at P3 (*in utero* electroporated at E15 with mCherry plasmid) are positive for the neuronal marker NeuN. (B, C) mCherry-transfected cells (*in utero* electroporated at E15) located in upper layer II do not express Sox2 or Pax6 (stem cell markers) upon ionomycin treatment at P3. (D) Tbr2 expression increases upon calcium influx in mCherry-transfected cells located in layer II at P3 (*in utero* electroporated at E15). Inset: Tbr2 nuclear staining (white arrows) of mCherry-transfected cells. (E) Quantification of mCherry-transfected cells in layer II that express Tbr2 (\*\*p = 0.0003 by t test; values are mean  $\pm$  s.e.m.). Scale bar: (A, D) 10  $\mu$ m, (B, C) 20 $\mu$ m.
