# Supplementary material
Source: PubMed Central journal article supplement (PMC5034108)
Supplement: cr201676x9.pdf [file cr201676x9.pdf]

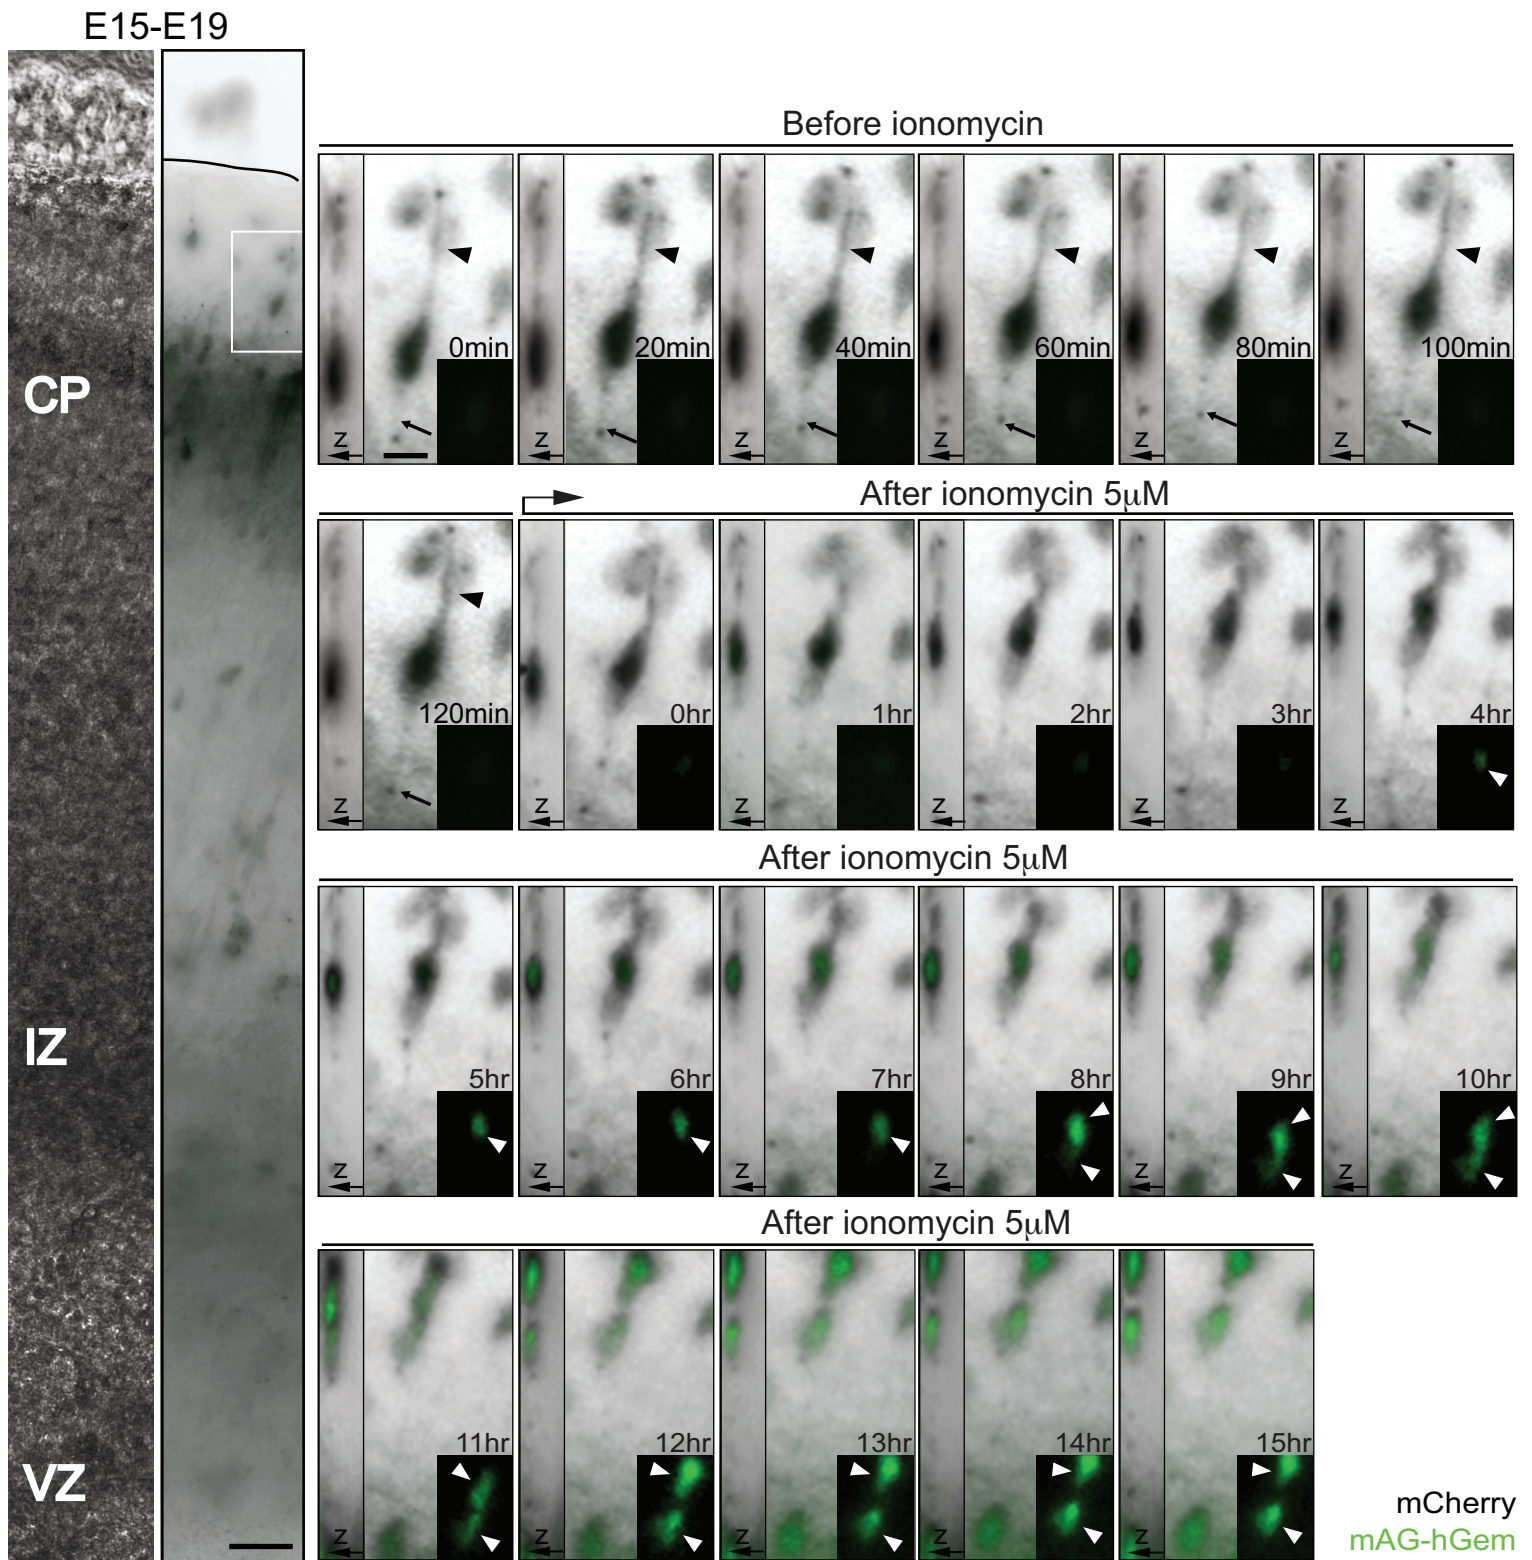

**Figure S9. Calcium influx induces mAG-hGem expression and cell division in developing neurons from the CP.** Neuron with a leading process and trailing process or axon (arrowhead and arrow respectively, in the time-lapse sequence) in the CP from E19 coronal brain slice (left panels, *in utero* electroporated at E15 with mCherry and mAG-hGem plasmids) express the S/G<sub>2</sub>/M marker mAG-hGem (white arrowheads, insets from time-lapse sequence) and divide upon ionomycin treatment (5  $\mu$ M). Scale bar: 50  $\mu$ m (Left panel) and 10  $\mu$ m (time-lapse sequence).
