# Supplementary material
Source: PubMed Central journal article supplement (PMC5034108)
Supplement: cr201676x12.pdf [file cr201676x12.pdf]

## Supplementary Table 2

Primer sequences used for exon amplification

|        |                 |                       |
|--------|-----------------|-----------------------|
| Stx1a  | Forward (5'-3') | AGCTGGAAGAACTCATGTCC  |
| Stx1a  | Reverse (5'-3') | GAACATGTCGTGTAGCTCAC  |
| Vtn    | Forward (5'-3') | CTGGCTGACCAAGAGTCATGC |
| Vtn    | Reverse (5'-3') | AGTCCTCTATGATAGGAGTCC |
| Map3k8 | Forward (5'-3') | ATGAGCACTGGAAGTGACGA  |
| Map3k8 | Reverse (5'-3') | ACAGATGACAGCCAGGGAAC  |
| AdprA  | Forward (5'-3') | GTTGGGGAGTGTTGGAGATG  |
| AdprA  | Reverse (5'-3') | GATGGTGTTCGCTCACTG    |
| Apobr  | Forward (5'-3') | TGTCTCTGTCCCTCGGAGTC  |
| Apobr  | Reverse (5'-3') | TTTTTCTTCTGGCTGGCACT  |
| Uhrf1  | Forward (5'-3') | TGCTCGCACTGTGATACCAT  |
| Uhrf1  | Reverse (5'-3') | GCCTGATGTTGCCGTATAGC  |
